# Supplementary material for: The potential application of phosphorene as an anode material in Li-ion batteries
Source: Royal Society of Chemistry journal article supplement (doi:10.1039/c4ta04368e), 2014-09-23
Supplement: c4ta04368e1.pdf [file c4ta04368e1.pdf]

## The Potential Application of Phosphorene as Anode Materials in Li-ion Batteries

Shijun Zhao,<sup>1,2</sup> Wei Kang,<sup>1,2</sup> and Jianming Xue<sup>1,3</sup>

<sup>1</sup>*HEDPS, Center for Applied Physics and Technology,  
Peking University, Beijing 100871, P. R. China*

<sup>2</sup>*College of Engineering, Peking University, Beijing 100871, P. R. China*

<sup>3</sup>*State Key Laboratory of Nuclear Physics and Technology,  
School of Physics, Peking University, Beijing 100871, P. R. China*

Here are the supplementary figures:

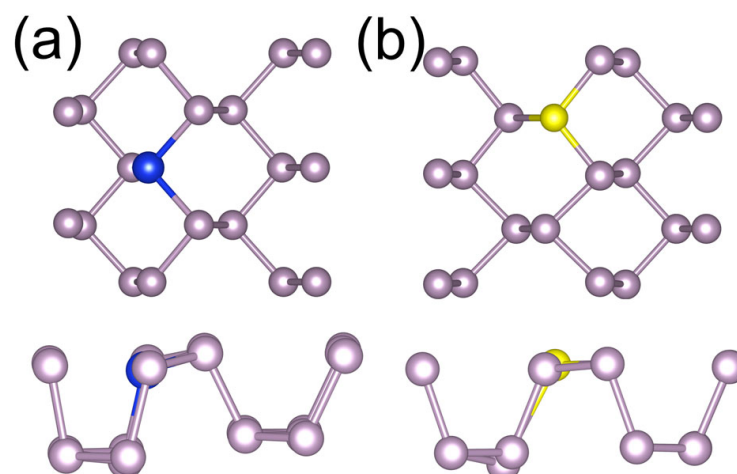

FIG. S1. Configurations of Si (a) and S (b) doped phosphorene monolayer.

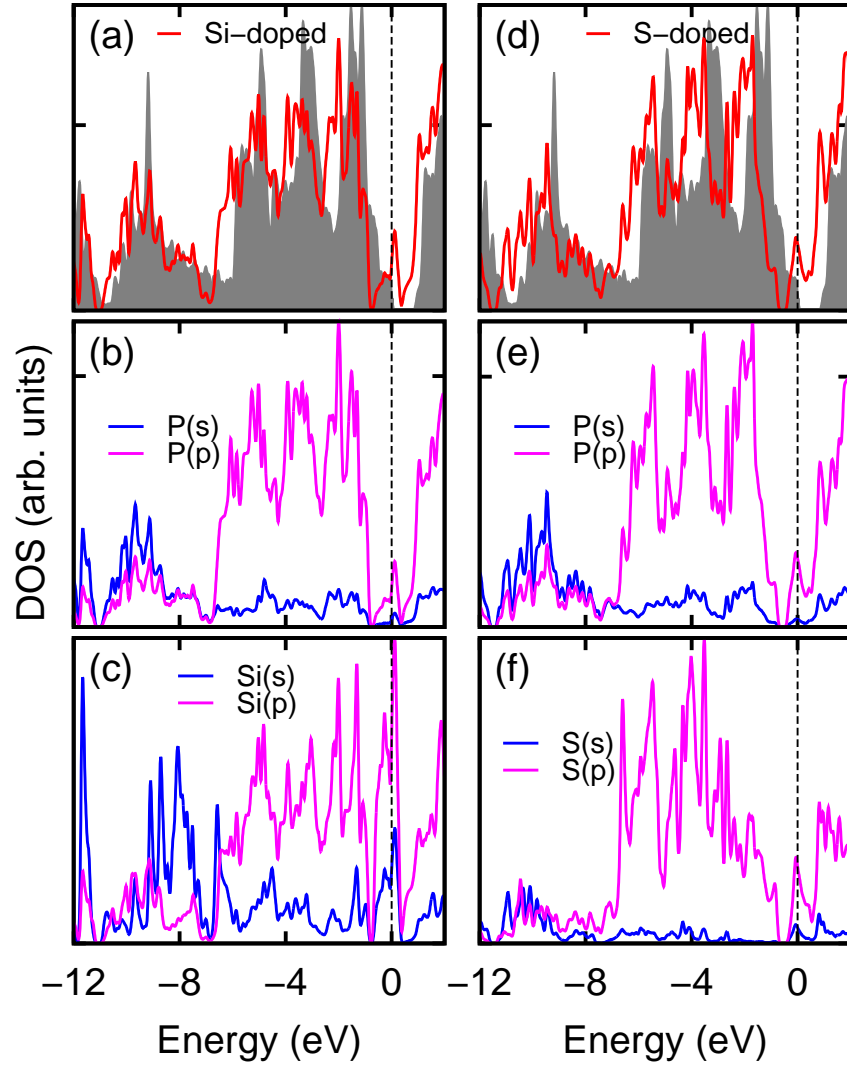

FIG. S2. Total and projected density of states (DOS) of Si-doped (panel a, b and c) and S-doped (panel d, e and f) phosphorene. The total DOS of pristine phosphorene is plotted as shaded area in (a) and (d).

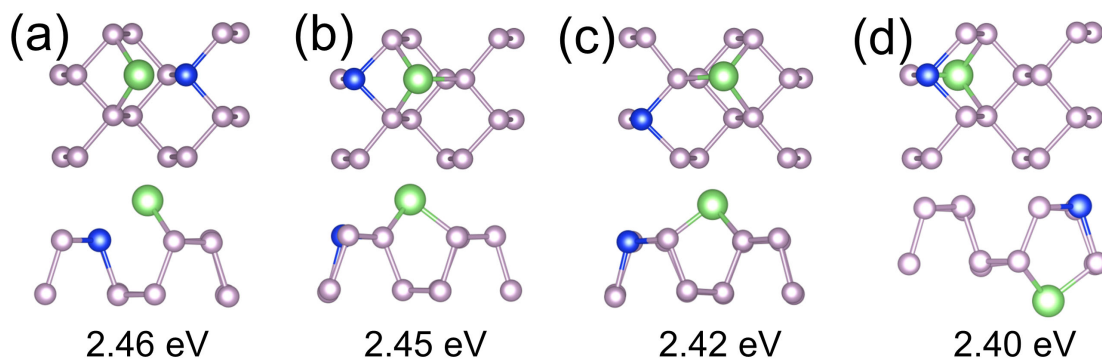

FIG. S3. Optimized configurations of Li adsorbed on Si-doped phosphorene.

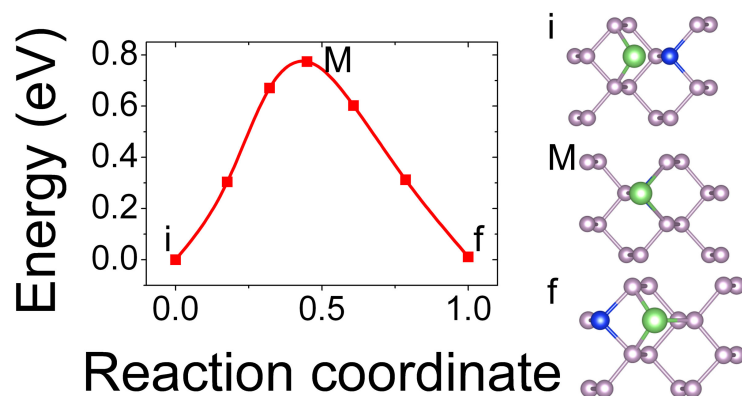

FIG. S4. Diffusion barrier and path of Li on Si-doped phosphorene.

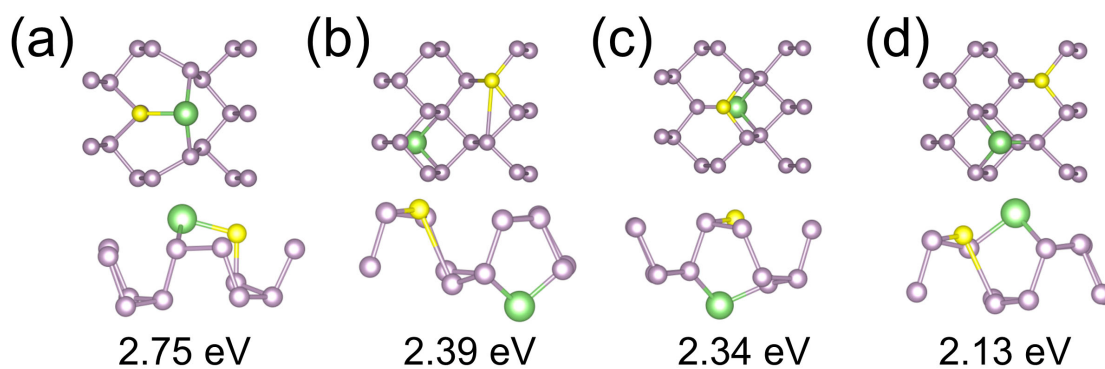

FIG. S5. Configurations of Li atoms adsorbed on S-doped phosphorene monolayer.
